# Supplementary material for: Total synthesis of viridiofungin A
Source: Royal Society of Chemistry journal article supplement (doi:10.1039/b500660k), 2005-01-01
Supplement: b500660k.pdf [file b500660k.pdf]

## Total synthesis of viridiofungin A

Kenji Morokuma, Keisuke Takahashi, Jun Ishihara and Susumi Hatakeyama\*

*Graduate School of Biomedical Sciences, Nagasaki University, Nagasaki 852-8521, Japan*

susumi@net.nagasaki-u.ac.jp

### Supporting Information

**General Procedure.** Where appropriate, reactions were performed in flame-dried glassware under an argon atmosphere. All extracts were dried over  $\text{MgSO}_4$  and concentrated by rotary evaporation below 30 °C at ca. 25 Torr. Commercial reagents and solvents were used as supplied with the following exceptions. Anhydrous tetrahydrofuran (THF) was purchased from Kanto Chemical Co., Inc. Dichloromethane ( $\text{CH}_2\text{Cl}_2$ ), triethylamine, dimethyl sulfoxide (DMSO), and *N,N*-dimethylformamide (DMF) were distilled from  $\text{CaH}_2$ . Toluene was distilled from  $\text{P}_2\text{O}_5$ . Analytical thin-layer chromatography was performed with Merck F-254 TLC plates. Column chromatography was performed employing silica gel 60 (230-630 mesh ASTM, Merk). Recycling preparative HPLC was performed using LC-908 (Japan Analytical Industry Co., LTD). Infrared spectra were measured on a JASCO FTIR-230 spectrometer. Optical rotations were recorded on a JASCO DIP-370 polarimeter at ambient temperature.  $^1\text{H}$  and  $^{13}\text{C}$  NMR spectra were measured on a Varian Gemini 300, JEOL JNM-AL 400, or a Varian Unity plus 500 spectrometer. Tetramethylsilane (TMS) was defined as 0 ppm for  $^1\text{H}$  NMR spectra and the central line of the triplet of  $\text{CDCl}_3$  was defined as 77.10 ppm for  $^{13}\text{C}$  NMR spectra. EI and FAB Mass spectra were measured on a JEOL JMS-DX303 or a JEOL JMS-700N.

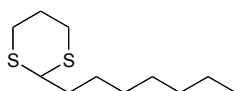

**2-Heptyl-1,3-dithiane.** To a stirred solution of 1-octanal (15.3 g, 0.119 mol) in  $\text{CH}_2\text{Cl}_2$  (500 ml) at 0 °C were added 1,3-propanedithiol (15 ml, 0.150 mol) and  $\text{BF}_3 \cdot \text{Et}_2\text{O}$  (13 ml, 0.105 mol). After being stirred at 0 °C for 2 h, the reaction

was quenched with saturated  $\text{NaHCO}_3$  (300 ml). The reaction mixture was extracted with  $\text{CH}_2\text{Cl}_2$ , washed with brine, and concentrated. Purification of the residue by distillation gave 2-heptyl-1,3-dithiane (25.1 g, 97%) as a pale yellow oil: bp 96 °C (0.15 mmHg);  $^1\text{H}$  NMR (300 MHz,  $\text{CDCl}_3$ )  $\delta$  0.86 (t,  $J$  = 6.3 Hz, 3H), 1.26 (m, 8H), 1.48 (quint,  $J$  = 6.3 Hz, 2H), 1.71 (m, 2H), 1.85 (m, 1H), 2.11 (dq,  $J$  = 4.2, 14.1 Hz, 1H), 2.83 (m, 4H), 4.03 (t,  $J$  = 6.9 Hz, 1H);  $^{13}\text{C}$  NMR (75 MHz,  $\text{CDCl}_3$ )  $\delta$  14.2, 22.7, 26.1, 26.7, 29.1, 29.3, 30.6, 31.8, 35.5, 47.8; FTIR (neat) 1457, 1421, 1274, 1186  $\text{cm}^{-1}$ ; MS (EI)  $m/z$  119 (100), 218 ( $\text{M}^+$ ); HRMS (EI) calcd. for  $\text{C}_{11}\text{H}_{22}\text{S}_2$  ( $\text{M}^+$ ) 218.1163, found 218.1182.

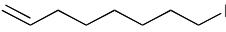 **8-Iodooct-1-ene.** To a stirred solution of 7-octene-1-ol (10.0 g, 0.0780 mol), triphenylphosphine (41.0 g, 0.160 mol), and 2,6-lutidine (36 ml, 0.310 mol) in CH<sub>2</sub>Cl<sub>2</sub> (500 ml) at 0 °C was added iodine (41.5 g, 0.160 mol). After being stirred at 0 °C for 1 h, the reaction mixture was acidified with 1 M HCl (300 ml) and diluted with hexane (300 ml). The organic layer was washed with H<sub>2</sub>O, saturated Na<sub>2</sub>S<sub>2</sub>O<sub>3</sub>, and saturated NaHCO<sub>3</sub>, dried, concentrated, and chromatographed (SiO<sub>2</sub> 135 g, hexane) to give 8-iodo-1-ene (17.5 g, 96%) as a colorless oil: <sup>1</sup>H NMR (300 MHz, CDCl<sub>3</sub>) δ 1.38 (m, 6H), 1.83 (quint., *J* = 7.1 Hz, 2H), 2.505 (dt, *J* = 6.9, 6.6 Hz, 2H), 3.19 (t, *J* = 6.9 Hz, 2H), 4.92 ~ 5.04 (m, 2H), 5.80 (ddt, *J* = 10.2, 17.1, 5.1 Hz, 1H); <sup>13</sup>C NMR (75 MHz, CDCl<sub>3</sub>) δ 7.3, 28.0, 28.7, 30.4, 33.5, 33.7, 114.4, 138.9; FTIR (neat) 1639, 1459, 1201, 1170 cm<sup>-1</sup>; MS (EI) *m/z* 41, 55, 69 (100), 111, 238 (M<sup>+</sup>); HRMS (EI) calcd. for C<sub>8</sub>H<sub>15</sub>I (M<sup>+</sup>) 238.0218, found 238.0224.

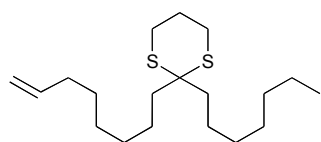

**2-Heptyl-2-(oct-7-enyl)-1,3-dithiane.** To a stirred solution of 2-heptyl-1,3-dithiane (5.42 g, 24.7 mmol) at –20 °C was added dropwise *n*-butyllithium (1.7 M in hexane, 15 ml, 25.5 mmol) over 10 min, and the mixture was stirred at the same temperature for 2 h. Then, 8-iodo-1-ene (5.41 g, 22.7 mmol) in THF (10 ml) was added dropwise to this mixture at –30 °C over 45 min. After being stirred at –30 °C for 19 h, the reaction was quenched with MeOH (5 ml). The reaction mixture was extracted with Et<sub>2</sub>O, washed with brine, dried, and concentrated. Purification of the residue by column chromatography (SiO<sub>2</sub> 150 g, hexane/AcOEt = 30/1) gave 2-heptyl-2-(oct-7-enyl)-1,3-dithiane (6.41 g, 86%) as a pale yellow oil: <sup>1</sup>H NMR (300 MHz, CDCl<sub>3</sub>) δ 0.82 (t, *J* = 6.8 Hz, 3H), 1.23 (m, 14H), 1.32 (m, 4H), 1.78 (m, 2H), 1.88 (m, 2H), 1.97 (dt, *J* = 6.3, 6.9 Hz, 2H), 2.73 (t, *J* = 5.4 Hz, 4H), 4.84-4.95 (m, 2H), 5.73 (ddt, *J* = 10.2, 16.8, 6.6 Hz, 1H); <sup>13</sup>C NMR (75 MHz, CDCl<sub>3</sub>) δ 14.1, 22.6, 24.0, 25.6, 26.0, 28.9, 29.0, 29.2, 29.7, 29.8, 31.8, 33.8, 38.1, 53.3, 114.2, 139.0; FTIR (neat) 1455, 1270 cm<sup>-1</sup>; MS (EI) *m/z* 229 (100), 328 (M<sup>+</sup>); HRMS (EI) calcd. for C<sub>19</sub>H<sub>36</sub>S<sub>2</sub> (M<sup>+</sup>) 328.2258, found 328.2249.

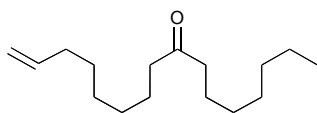

**Hexadec-15-en-8-one (6).** To a stirred solution of 2-heptyl-2-(oct-7-enyl)-1,3-dithiane (994 mg, 3.03 mmol) in MeOH (16 ml) at room temperature was added *N*-chlorosuccinimide (500 mg, 3.74 mmol). After being stirred at room temperature for 30 min, 1 M HCl (6 ml) was added and the mixture was stirred for 30 min. The reaction mixture was diluted with Et<sub>2</sub>O, washed with H<sub>2</sub>O and brine, dried, concentrated, and chromatographed (SiO<sub>2</sub> 10 g, hexane/AcOEt = 40/1) to give **6** (446 mg, 62%) as a colorless oil: <sup>1</sup>H NMR (300 MHz, CDCl<sub>3</sub>) δ 0.88 t, *J* = 6.6 Hz, 3H), 1.27 m, 14H), 1.56 (m, 4H), 2.04 (dt, *J* = 7.2, 6.9 Hz, 2H), 2.38 (t, *J* = 7.5 Hz, 4H), 4.91 ~ 5.02 (m, 2H), 5.80 (ddt, *J*

= 10.5, 17.4, 6.6 Hz, 1H);  $^{13}\text{C}$  NMR (75 MHz,  $\text{CDCl}_3$ )  $\delta$  14.1, 22.7, 23.9 (2), 28.8, 28.9, 29.1, 29.3, 31.7, 33.8, 42.8, 42.9, 114.3, 139.1, 211.7; FTIR (neat) 1700, 1461  $\text{cm}^{-1}$ ; MS (EI)  $m/z$  57, 71, 96, 111, 127 (100), 139, 155, 209, 238 ( $\text{M}^+$ ); HRMS (EI) calcd. for  $\text{C}_{16}\text{H}_{30}\text{O}$  ( $\text{M}^+$ ) 238.2297, found 238.2274.

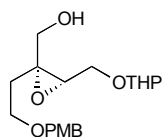

**(2R,3S)-2,3-Epoxy-2-[2-(4-methoxybenzyl)oxyethyl]-4-(tetrahydropyran-2-yl)oxybutan-1-ol (8).**

To a suspension of powdered 4A molecular sieves (4.0 g), prepared by heating overnight at 130 °C under 0.1 mmHg, in  $\text{CH}_2\text{Cl}_2$  (70 ml) at -40 °C were added (-)-diethyl D-tartrate (0.76 ml, 4.46 mmol) and  $\text{Ti}(\text{O}^i\text{Pr})_4$  (1.10 ml, 3.72 mmol) and the mixture was stirred for 30 min at -40 °C. *tert*-Butyl hydroperoxide (3.04 M in  $\text{CH}_2\text{Cl}_2$ , 9.8 ml, 29.7 mmol) and then, 30 min later, a solution of **7**<sup>1</sup> (5.00 g, 14.9 mmol) in  $\text{CH}_2\text{Cl}_2$  (30 ml) were added to the mixture at -40 °C. After being stirred at -20 °C for 7 h, the mixture was treated with a solution of  $\text{FeSO}_4 \cdot 7\text{H}_2\text{O}$  (16.5 g, 59.3 mmol) and tartaric acid (11.6 g, 77.3 mmol) in  $\text{H}_2\text{O}$  (90 ml), allowed to warm to room temperature, and stirred overnight. The reaction mixture was diluted with  $\text{H}_2\text{O}$  (100 ml), extracted with  $\text{CH}_2\text{Cl}_2$ , dried, and concentrated. The residue was dissolved into  $\text{Et}_2\text{O}$  (60 ml) and 1 M NaOH (40 ml) was added to the solution at 0 °C. After stirring at room temperature for 1 h, the mixture was extracted with  $\text{CH}_2\text{Cl}_2$ , washed with brine, dried, and concentrated. Purification of the residue by column chromatography ( $\text{SiO}_2$  100 g, hexane/ $\text{AcOEt}$  = 1/3) gave **2** (5.11 g, 98%) as a colorless oil:  $^1\text{H}$  NMR (300 MHz,  $\text{CDCl}_3$ )  $\delta$  1.53-1.82 m, 6H), 1.88-1.98 (m, 1H), 2.01-2.11 (m, 1H), 3.09-3.15 (m, 1H), 3.36 (br t,  $J$  = 5.4 Hz, 0.5H), 3.38 (br t,  $J$  = 6.0 Hz, 0.5H), 3.81 s, 3H), 3.49-3.93 (m, 8H), 4.45 (s, 2H), 4.66-4.70 (m, 1H), 6.88 (d,  $J$  = 8.4 Hz, 2H), 7.27 (d,  $J$  = 8.7 Hz, 2H);  $^{13}\text{C}$  NMR (75 MHz,  $\text{CDCl}_3$ )  $\delta$  18.9, 19.3, 25.2, 30.2, 30.4, 34.4, 34.5, 55.2, 61.0, 61.5, 61.8, 62.0, 62.3, 62.9 (2), 64.5, 65.8, 66.1, 72.9, 97.8, 99.4, 113.8, 129.4, 129.8, 159.3; FTIR (neat) 3424, 1612, 1513, 1247, 1031  $\text{cm}^{-1}$ ; MS (EI)  $m/z$  85, 121 (100), 137, 189, 206, 267 [ $(\text{M}-\text{THP})^+$ ], 352 ( $\text{M}^+$ ); HRMS (EI) calcd for  $\text{C}_{19}\text{H}_{28}\text{O}_6$  ( $\text{M}^+$ ) 352.1886, found 352.1863.

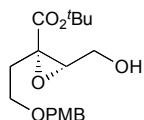

**(2S,3S)-3-(*tert*-Butoxycarbonyl)-2,3-epoxy-5-(4-methoxybenzyl)oxypentan-1-ol (9).**

To a stirred solution of **8** (5.09 g, 14.44 mmol) in  $\text{CH}_2\text{Cl}_2$ -DMSO (1:1) (86 ml) at room temperature were added triethylamine (60 ml, 427 mmol) and  $\text{SO}_3 \cdot \text{pyridine}$  complex (20.7 g, 130 mmol). After being stirred at room temperature for 1 h, the reaction mixture was diluted with  $\text{H}_2\text{O}$  (200 ml), extracted with  $\text{CH}_2\text{Cl}_2$ , washed with brine, dried, and concentrated. Purification of the residue by column chromatography ( $\text{SiO}_2$  100 g, hexane/ $\text{AcOEt}$  = 2/1) afforded the corresponding aldehyde (6.09 g) as a yellow oil:  $^1\text{H}$  NMR (300 MHz,  $\text{CDCl}_3$ )  $\delta$  1.53-1.90 m, 7H), 2.37-2.47 m, 1H), 3.43-3.60 m, 5H), 3.70 dd,  $J$  = 2.1, 12.0 Hz, 0.5H), 3.72 dd,  $J$  = 2.7, 12.0 Hz, 0.5H), 3.79 (s, 3H), 3.93 dd,  $J$  = 4.8, 12.0 Hz, 0.5H), 3.98 dd,  $J$  = 3.9, 13.2 Hz, 0.5H), 4.41 (s, 2H), 4.62 (m, 1H), 6.86 (d,  $J$  = 8.4 Hz, 2H), 7.22 (d,  $J$  = 8.4 Hz, 2H), 9.45 (s, 0.5H), 9.46 (s, 0.5H);  $^{13}\text{C}$

NMR (75 MHz, CDCl<sub>3</sub>)  $\delta$  18.8, 19.0, 25.2, 30.1, 30.2, 31.0, 31.1, 55.2, 61.7, 62.0, 63.3, 63.5, 63.9, 65.1, 72.6, 98.6, 99.0, 113.7, 129.2, 130.1, 159.1, 198.5, 198.6; FTIR (neat) 1724, 1513, 1454, 1247, 1124, 1033 cm<sup>-1</sup>.

To a stirred solution of the aldehyde (6.09 g) in *tert*-BuOH-H<sub>2</sub>O (5:1) (500 ml) at 0 °C were added 2-methyl-2-butene (46 ml, 408 mmol), NaH<sub>2</sub>PO<sub>4</sub>·2H<sub>2</sub>O (7.88 g, 50.5 mmol), and NaClO<sub>2</sub> (80% purity, 5.71 g, 50.5 mmol). After being stirred at room temperature for 12 h, the reaction mixture was diluted with brine (200 ml), extracted with AcOEt, dried, and concentrated to give the corresponding carboxylic acid (7.14 g) as a yellow oil, which was used for the next reaction without purification: <sup>1</sup>H NMR (300 MHz, CDCl<sub>3</sub>)  $\delta$  1.48-1.78 m, 6H), 1.90-2.06 m, 1H), 2.42-2.46 m, 1H), 3.34-3.37 m, 1H), 3.46-3.92 m, 6H), 3.78 (s, 3H), 4.43 (s, 2H), 4.63-4.67 m, 2H), 6.85 (d, *J* = 8.7 Hz, 2H), 7.23 (d, *J* = 8.4 Hz, 2H); <sup>13</sup>C NMR (75 MHz, CDCl<sub>3</sub>)  $\delta$  18.9, 19.0, 25.2, 30.2, 31.1, 55.2, 61.3, 61.6, 61.9, 62.0, 64.7, 65.0, 65.6, 72.6, 98.7, 98.9, 113.5, 129.3, 130.0, 159.1, 160.1; FTIR (neat) 2942, 1793, 1513, 1249, 1112, 1029 cm<sup>-1</sup>.

To a solution of the carboxylic acid (7.14 g) in CH<sub>2</sub>Cl<sub>2</sub> (50 ml) was added a solution of *N,N*-diisopropyl-*O*-2-*tert*-butylisourea<sup>2</sup> (28.9 g, 144 mmol) in CH<sub>2</sub>Cl<sub>2</sub> (22 ml) at 0 °C over 5 min, and the mixture was stirred at room temperature for 12 days. The reaction mixture was filtered through Celite and the filter-pad was washed with Et<sub>2</sub>O. The filtrate and washings were concentrated and chromatographed (SiO<sub>2</sub>, 150 g, hexane/AcOEt = 4/1) to give the corresponding *tert*-butyl ester (5.35 g, 88% by 3 steps) as a pale yellow oil: <sup>1</sup>H NMR (300 MHz, CDCl<sub>3</sub>)  $\delta$  1.43 s, 9H), 1.46-1.82 m, 7H), 2.49 dt, *J* = 14.4, 6.9 Hz, 1H), 3.26 m, 1H), 3.48-3.61 m, 4H), 3.78 s, 3H), 3.81-3.88 m, 2H), 4.42 (s, 2H), 4.60-4.64 (m, 1H), 6.86 (d, *J* = 8.4 Hz, 2H), 7.25 (d, *J* = 8.4 Hz, 2H); <sup>13</sup>C NMR (75 MHz, CDCl<sub>3</sub>)  $\delta$  19.0, 19.3, 25.3, 27.8, 30.3, 30.4, 33.3, 33.4, 55.1, 60.1, 60.3, 60.8, 61.4, 61.7, 62.2, 64.6, 65.1, 65.5 (2), 82.3, 82.4, 98.5, 99.1, 113.6, 129.3, 130.2, 159.1, 167.8; FTIR (neat) 1735, 1513, 1455, 1361, 1249, 1137, 1031, cm<sup>-1</sup>; MS (EI) *m/z* 85 (100), 137, 281, 337 [(M-THP)<sup>+</sup>], 365 [(M-*t*Bu)<sup>+</sup>], 422 (M<sup>+</sup>); HRMS (EI) calcd for C<sub>23</sub>H<sub>34</sub>O<sub>7</sub> (M<sup>+</sup>) 422.2304, found 422.2326.

To a solution of the *tert*-butyl ester (1.04g, 2.45 mmol) in MeOH (24 ml) was added pyridinium *p*-toluenesulfonate (185 mg, 0.735 mmol), and the mixture was stirred at room temperature for 39 h. The reaction mixture was diluted with saturated NaHCO<sub>3</sub> (10 ml), extracted with CH<sub>2</sub>Cl<sub>2</sub>, dried, and concentrated. Purification of the residue by column chromatography (SiO<sub>2</sub> 13 g, hexane/AcOEt = 4/1 to 1/1) afforded **9** (711 mg, 86%) as a pale yellow oil: [ $\alpha$ ]<sub>D</sub><sup>27</sup> -28.5 ° (*c* 1.03, CHCl<sub>3</sub>); <sup>1</sup>H NMR (300 MHz, CDCl<sub>3</sub>)  $\delta$  1.42 s, 9H), 1.79-1.85 m, 1H), 2.39 t, *J* = 6.9 Hz, 1H), 2.41 t, *J* = 7.2 Hz, 1H), 3.21 dd, *J* = 4.2, 6.0 Hz, 1H), 3.56 t, *J* = 5.7 Hz, 2H), 3.64-3.79 m, 2H), 3.79 (s, 3H), 4.42 (s, 2H), 6.86 (d, *J* = 8.7 Hz, 2H), 7.25 (d, *J* = 8.1 Hz, 2H); <sup>13</sup>C NMR (75 MHz, CDCl<sub>3</sub>)  $\delta$  27.8, 33.4, 55.2, 60.4, 61.0, 62.4, 65.4, 72.7, 82.7, 113.7, 129.4, 130.1, 159.2, 168.0; FTIR (neat) 3735, 3511, 2933, 1731, 1511, 1363, 1249, 1139, 1033, 831 cm<sup>-1</sup>; MS (EI) *m/z* 41 (100), 122, 138,

145, 233, 281 [(M-<sup>t</sup>Bu)<sup>+</sup>], 338 (M<sup>+</sup>); HRMS (EI) calcd for C<sub>18</sub>H<sub>26</sub>O<sub>6</sub> (M<sup>+</sup>) 338.1730, found 338.1748.

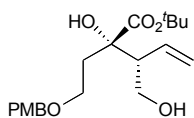

**(2R,3S)-3-(*tert*-Butoxycarbonyl)-5-(4-methoxybenzyl)oxy-2-vinyl-1,3-pentane**

**diol (10).** To a suspension of CuI (563 mg, 2.96 mmol) in THF (60 ml) was added a solution of vinylmagnesium bromide (1.14 M in THF, 26 ml, 29.6 mmol) at –26 °C,

and the mixture was stirred for 50 min at the same temperature. To the dark blue mixture was added dropwise a solution of **9** (1.00 g, 2.96 mmol) in THF (14 ml) at –26 °C over 5 min. After being stirred for 4 h at –26 °C, the reaction mixture was diluted with saturated NH<sub>4</sub>Cl (80 ml), allowed to warm to room temperature, and stirred for 1.5 h. The reaction mixture was filtered through Celite, extracted with CH<sub>2</sub>Cl<sub>2</sub>, washed with brine, dried, and concentrated. Purification of the residue by column chromatography (SiO<sub>2</sub> 40 g, hexane/AcOEt = 4/1 to 2/1) gave **10** (773 mg, 71%) as a pale yellow oil: [α]<sub>D</sub><sup>24</sup> +14.4 ° (c 0.910, CHCl<sub>3</sub>); <sup>1</sup>H NMR (300 MHz, CDCl<sub>3</sub>) δ 1.40 (s, 9H), 1.99–2.16 (m, 2H), 2.44 (ddd, *J* = 4.8, 5.1, 9.9 Hz, 1H), 2.68 (br s, 1H), 3.50 (t, *J* = 6.3 Hz, 2H), 3.77 (s, 3H), 3.74–3.80 (m, 2H), 4.00 (s, 1H), 4.36 (d, *J* = 11.7 Hz, 1H), 4.40 (d, *J* = 11.7 Hz, 1H), 5.18 (dd, *J* = 2.1, 16.2 Hz, 1H), 5.22 (dd, *J* = 1.8, 10.2 Hz, 1H), 5.89 (ddd, *J* = 9.3, 9.6, 16.8 Hz, 1H), 6.85 (d, *J* = 8.7 Hz, 2H), 7.22 (d, *J* = 8.4 Hz, 2H); <sup>13</sup>C NMR (75 MHz, CDCl<sub>3</sub>) δ 27.8, 36.6, 53.5, 55.1, 62.3, 65.6, 72.8, 77.8, 82.6, 113.7, 119.1, 129.4, 129.8, 137.7, 159.1, 173.7; FTIR (neat) 3469, 1720, 1612, 1513, 1369, 1249, 1155, 1035 cm<sup>–1</sup>; MS (EI) *m/z* 121 (100), 137, 309 [(M-<sup>t</sup>Bu)<sup>+</sup>]; HRMS (EI) calcd for C<sub>16</sub>H<sub>21</sub>O<sub>6</sub> [(M-<sup>t</sup>Bu)<sup>+</sup>] 309.1339, found 309.1339.

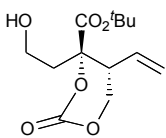

**(4S,5R)-4-(2-Hydroxyethyl)-4-*tert*-Butoxycarbonyl-5-vinyl-1,3-dioxan-2-one (11).**

To a stirred solution of **10** (773 mg, 2.11 mmol) and pyridine (1.9 ml, 23.0 mmol) in CH<sub>2</sub>Cl<sub>2</sub> (8 ml) at –78 °C was added dropwise a solution of triphosgene (751 mg, 2.53 mmol) in CH<sub>2</sub>Cl<sub>2</sub> (4 ml) over 5 min and the mixture was allowed to warm to room temperature. After being stirred at room temperature for 1 h, the reaction mixture was diluted with saturated NH<sub>4</sub>Cl (10 ml) and H<sub>2</sub>O (30 ml), extracted with CH<sub>2</sub>Cl<sub>2</sub>, washed with 1 M HCl and saturated NaHCO<sub>3</sub>, dried, and concentrated. Purification of the residue by column chromatography (SiO<sub>2</sub> 20 g, hexane/AcOEt = 5/1) gave the corresponding cyclic carbonate (653 mg, 79%) as a yellow oil: [α]<sub>D</sub><sup>25</sup> +21.0 ° (c 1.09, CHCl<sub>3</sub>); <sup>1</sup>H NMR (300 MHz, CDCl<sub>3</sub>) δ 1.45 (s, 9H), 2.04 (dt, *J* = 14.4, 6.3 Hz, 1H), 2.37 (dt, *J* = 14.4, 6.9 Hz, 1H), 2.96 (m, 1H), 3.61 (m, 2H), 3.79 (s, 3H), 4.12 (dd, *J* = 11.4, 12.3 Hz, 1H), 4.26 (dd, *J* = 5.7, 11.4 Hz, 1H), 4.40 (s, 2H), 5.26–5.36 (m, 2H), 5.62 (m, 1H), 6.86 (d, *J* = 9.0 Hz, 2H), 7.23 (d, *J* = 8.4 Hz, 2H); <sup>13</sup>C NMR (75 MHz, CDCl<sub>3</sub>) δ 27.7, 35.5, 43.5, 57.8, 63.6, 68.3, 72.7, 84.4, 113.7, 122.1, 129.2, 129.3, 129.9, 147.6, 159.1, 167.3; FTIR (neat) 1722, 1513, 1249, 1116, 1033 cm<sup>–1</sup>; MS (EI) *m/z* 121 (100), 137, 200, 335 [(M-<sup>t</sup>Bu)<sup>+</sup>], 392 (M<sup>+</sup>); HRMS (EI) calcd for

C<sub>21</sub>H<sub>28</sub>O<sub>7</sub> (M<sup>+</sup>) 392.1835, found 392.1852.

To a solution of the cyclic carbonate (653 mg, 1.66 mmol) in CH<sub>2</sub>Cl<sub>2</sub>-H<sub>2</sub>O (20:1) (19 ml) was added DDQ (982 mg, 4.33 mmol) at 0 °C, and the mixture was stirred at room temperature for 1 h. The reaction mixture was diluted with CH<sub>2</sub>Cl<sub>2</sub> (150 ml) and filtered through Celite and the filter-pad was washed with CH<sub>2</sub>Cl<sub>2</sub>. The filtrate and washings were washed with sat. NaHCO<sub>3</sub>, dried, concentrated, and chromatographed (SiO<sub>2</sub> 18 g, hexane/AcOEt = 4/1 to 1.5/1) to give **11** (476 mg, quant.) as a yellow oil: [α]<sub>D</sub><sup>25</sup> +19.5° (*c* 1.10, CHCl<sub>3</sub>); <sup>1</sup>H NMR (300 MHz, CDCl<sub>3</sub>) δ 1.44 (9H, s), 2.05 (dt, *J* = 14.4, 5.7 Hz, 1H), 2.42 (dt, *J* = 14.7, 7.2 Hz, 1H), 2.82 (m, 1H), 2.94 (m, 1H), 3.75 (m, 2H), 4.18 (dd, *J* = 10.8, 12.0 Hz, 1H), 4.36 (dd, *J* = 5.7, 11.1 Hz, 1H), 5.36 (d, *J* = 11.4 Hz, 1H), 5.43 (d, *J* = 5.4 Hz, 1H), 5.55 (m, 2H); <sup>13</sup>C NMR (75 MHz, CDCl<sub>3</sub>) δ 27.7, 38.0, 43.5, 56.6, 68.4, 84.5, 84.9, 122.2, 129.0, 147.8, 167.6; FTIR (neat) 3453, 2979, 1747, 1407, 1371, 1255, 1159 cm<sup>-1</sup>.

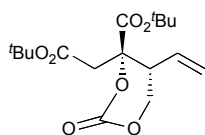

**(4S,5R)-4-(tert-Butoxycarbonyl)methyl-4-tert-butoxycarbonyl-5-vinyl-1,3-dioxan-2-one (12).** To a solution of **11** (50.0 mg, 0.184 mmol) in acetone (5 ml) was

added Jones reagent (2.68 M, 175 μl, 0.478 mmol) at -10 °C, and the mixture was

stirred for 1 h at the same temperature. After addition of <sup>i</sup>PrOH (750 μl), the mixture was allowed to warm to room temperature and stirred for 10 min. The reaction mixture was diluted with AcOEt, washed with brine, dried, and concentrated to give the corresponding carboxylic acid as a pale yellow oil which was used for the next reaction without purification: <sup>1</sup>H NMR (300 MHz, CDCl<sub>3</sub>) δ 1.53 (s, 9H), 2.77 (d, *J* = 17.1 Hz, 1H), 3.05 (m, 1H), 3.24 (d, *J* = 17.1 Hz, 1H), 4.19 (dd, *J* = 11.4, 11.7 Hz, 1H), 4.30 (dd, *J* = 6.0, 11.4 Hz, 1H), 5.41 (d, *J* = 8.7 Hz, 1H), 5.41 (d, *J* = 17.4 Hz, 1H), 5.51 (m, 1H).

To a solution of the carboxylic acid in CH<sub>2</sub>Cl<sub>2</sub> (5 ml) was added a solution of *N,N*-diisopropyl-*O*-2-*tert*-butylisourea<sup>2</sup> (330 mg, 1.650 mmol) in CH<sub>2</sub>Cl<sub>2</sub> (2.5 ml) over 2 min at 0 °C, and the mixture was stirred at room temperature for 24 h. The reaction mixture was filtered through Celite and the filter-pad was washed with Et<sub>2</sub>O. The filtrate and washings were concentrated and chromatographed (SiO<sub>2</sub>, 5 g, hexane/AdOEt = 4/1) gave **12** as a colorless oil (52.5 mg, 84% by 2 steps): [α]<sub>D</sub><sup>27</sup> +25.1° (*c* 0.91, CHCl<sub>3</sub>); <sup>1</sup>H NMR (300 MHz, CDCl<sub>3</sub>) δ 1.45 (s, 9H), 1.53 (s, 9H), 2.66 (d, *J* = 16.8 Hz, 1H), 3.06 (d, *J* = 16.8 Hz, 1H), 3.11 (ddd, *J* = 6.0, 8.1, 11.7 Hz, 1H), 4.19 (dd, *J* = 11.4, 11.7 Hz, 1H), 4.27 (dd, *J* = 6.3, 11.4 Hz, 1H), 5.38 (dd, *J* = 1.5, 9.6 Hz, 1H), 5.39 (dd, *J* = 1.5, 17.4 Hz, 1H), 5.54 (ddd, *J* = 8.1, 9.6, 17.4 Hz, 1H); <sup>13</sup>C NMR (75 MHz, CDCl<sub>3</sub>) δ 27.9, 28.0, 41.3, 42.6, 67.9, 81.9, 83.4, 84.7, 123.0, 128.9, 166.8, 167.0; FTIR (neat) 1768, 1367, 1153 cm<sup>-1</sup>; MS (EI) *m/z* 57, 124, 186 (100), 213, 230, 269 [(M-O<sup>t</sup>Bu)<sup>+</sup>]; HRMS (EI) calcd for C<sub>13</sub>H<sub>17</sub>O<sub>6</sub> [(M-O<sup>t</sup>Bu)<sup>+</sup>] 296.1025, found 296.1030.

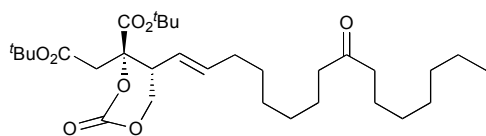

**(4S,5R)-4-(tert-Butoxycarbonyl)methyl-4-tert-butoxycarbonyl-5-[(E)-9-oxohexadec-1-enyl]-1,3-dioxan-2-one (15).**

To a degassed solution of **12** (160 mg, 0.468 mmol) and hexadec-15-en-8-one (**6**) (223 mg, 0.935 mmol) in CH<sub>2</sub>Cl<sub>2</sub> (5 ml) was added catalyst **13** (40 mg, 0.047 mmol), and the reaction mixture was refluxed for 42 h. Catalyst **13** (40 mg, 0.047 mmol) was added again, and the mixture was refluxed for 42 h. The reaction mixture was cooled to room temperature and concentrated. The residue was purified by column chromatography (SiO<sub>2</sub> 20 g, hexane/AcOEt = 15/1 to 4/1) followed by recycled HPLC (gel permeation, 3.5 ml/min, CHCl<sub>3</sub>, 3 cycle) to give a 88:12 mixture of **15** and its *Z*-isomer (168 mg, 65%) and recovered **12** (39 mg, 24 %) each as a colorless oil. Pure **15** and its *Z*-isomer were obtained by flash chromatography of the *E/Z*-mixture (SiO<sub>2</sub> 20 g, hexane/AcOEt = 10/1 to 5/1).

Compound **15**:  $[\alpha]_D^{24} +20.6^\circ$  (*c* 0.980, CHCl<sub>3</sub>); <sup>1</sup>H NMR (300 MHz, CDCl<sub>3</sub>)  $\delta$  0.88 (t, *J* = 7.2 Hz, 3H), 1.20-1.40 (m, 18H), 1.46 (s, 9H), 1.54 (s, 9H), 2.05 (m, 2H), 2.38 (t, *J* = 7.8 Hz, 2H), 2.39 (t, *J* = 7.5 Hz, 2H), 2.63 (d, *J* = 16.2 Hz, 1H), 3.02 (m, 1H), 3.04 (d, *J* = 16.5 Hz, 1H), 4.10-4.25 (m, 2H), 5.08 (dd, *J* = 9.2, 15.6 Hz, 1H), 5.79 (dt, *J* = 15.0, 6.9 Hz, 1H); <sup>13</sup>C NMR (75 MHz, CDCl<sub>3</sub>)  $\delta$  14.0, 22.6, 23.6, 23.8, 27.9, 28.0, 28.6, 28.9, 29.0, 29.1, 29.2, 31.6, 32.6, 41.4, 41.7, 42.6, 42.8, 68.3, 81.8, 83.6, 84.4, 120.2, 139.5, 147.2, 166.9, 167.1, 211.5; FTIR (neat) 1770, 1463, 1369, 1155 cm<sup>-1</sup>; MS (EI) *m/z* 299, 334, 356, 378, 423, 440 (100), 552 (M<sup>+</sup>); HRMS (EI) calcd for C<sub>31</sub>H<sub>52</sub>O<sub>8</sub> (M<sup>+</sup>) 552.3662, found: 552.3655.

*Z*-isomer of **15**: <sup>1</sup>H NMR (300 MHz, CDCl<sub>3</sub>)  $\delta$  0.88 (t, *J* = 6.9 Hz, 3H), 1.27 (m, 18H), 1.45 (s, 9H), 1.54 (s, 9H), 2.11 (m, 2H), 2.39 (t, *J* = 7.4 Hz, 2H), 2.40 (t, *J* = 7.4 Hz, 2H), 2.60 (d, *J* = 16.8 Hz, 1H), 3.03 (d, *J* = 16.8 Hz, 1H), 3.42 (dt, *J* = 10.2, 7.2 Hz, 1H), 4.09-4.13 (m, 2H), 5.06 (dd, *J* = 9.9, 11.1 Hz, 1H), 5.78 (dt, *J* = 11.1, 7.6 Hz, 1H); <sup>13</sup>C NMR (100 MHz, CDCl<sub>3</sub>)  $\delta$  14.1, 22.6, 23.6, 23.9, 27.8, 27.9, 28.0, 29.0, 29.1, 29.2 (2), 31.6, 32.1, 36.4, 41.2, 42.6, 42.8, 67.8, 81.8, 83.7, 84.5, 119.1, 138.6, 167.6, 167.8, 211.2; FT-IR (neat) 2927, 2857, 1770, 1735, 1367, 1153, 1100 cm<sup>-1</sup>; MS (EI) *m/z* 57, 356, 423, 440 (100), 496, 552 (M<sup>+</sup>); HRMS (EI) calcd for C<sub>31</sub>H<sub>52</sub>O<sub>8</sub> (M<sup>+</sup>) 552.3662, found 552.3642.

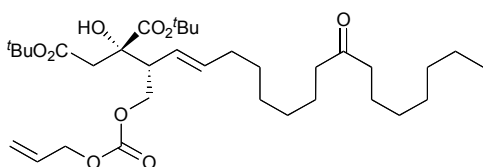

**(S)-Di-tert-Butyl 2-Hydroxy-2-[(R,E)-1-(allyloxycarbonyloxy)-11-oxooctadec-3-en-2-yl]succinate (17).** To a solution of **15** (121 mg, 0.218 mmol) in allyl alcohol (8 ml) was added K<sub>2</sub>CO<sub>3</sub>

(90.4 mg, 0.654 mmol) at -20 °C, and the mixture was stirred at that temperature for 5.5 h. The reaction mixture was diluted with saturated NH<sub>4</sub>Cl (50 ml) and H<sub>2</sub>O (10 ml), extracted with Et<sub>2</sub>O,

dried, and concentrated. Purification of the residue by column chromatography (SiO<sub>2</sub> 5 g, hexane/AcOEt = 8/1) gave **17** (105 mg, 80%) as a pale yellow oil:  $[\alpha]_D^{25} +6.9^\circ$  (*c* 1.06, CHCl<sub>3</sub>); <sup>1</sup>H NMR (300 MHz, CDCl<sub>3</sub>)  $\delta$ 0.87 (t, *J* = 7.2 Hz, 3H), 1.20-1.40 (m, 18H), 1.43 (s, 9H), 1.46 (s, 9H), 1.98 (m, 2H), 2.37 (t, *J* = 7.2 Hz, 4H), 2.60 (ddd, *J* = 5.4, 7.5, 9.3 Hz, 1H), 2.68 (d, *J* = 16.8 Hz, 1H), 2.81 (d, *J* = 16.8 Hz, 1H), 3.83 (s, 1H), 4.16 (dd, *J* = 8.0, 10.8 Hz, 1H), 4.35 (dd, *J* = 5.3, 10.8 Hz, 1H), 4.60 (d, *J* = 5.7 Hz, 2H), 5.23-5.37 (m, 3H), 5.53 (dt, *J* = 6.6, 15.3 Hz, 1H), 5.91 (m, 1H); <sup>13</sup>C NMR (75 MHz, CDCl<sub>3</sub>)  $\delta$ 14.0, 22.6, 23.6, 23.7, 23.8, 28.0, 28.1, 28.8, 28.9, 29.0, 29.2, 31.6, 32.4, 42.7, 42.8, 43.1, 50.2, 67.0, 68.3, 75.4, 81.3, 82.8, 110.7, 124.8, 131.6, 135.8, 154.8, 169.9, 172.7, 211.6; FTIR (neat) 3492, 1747, 1457, 1392, 1369, 1255, 1155 cm<sup>-1</sup>; MS (EI) *m/z* 57, 127, 182, 264 (100), 333, 396, 453, 498, 537 [(M-O<sup>t</sup>Bu)<sup>+</sup>]; HRMS (EI) calcd for C<sub>30</sub>H<sub>49</sub>O<sub>8</sub> [(M-O<sup>t</sup>Bu)<sup>+</sup>] 537.3427, found 537.3422.

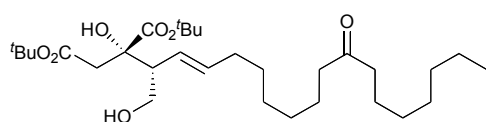

**(S)-Di-tert-Butyl**  
**2-Hydroxy-2-[(R,E)-1-hydroxy-11-oxooctadec-3-en-2-yl]**  
**succinate (18).**

To a degassed solution of **17** in THF (8 ml) were added HCOONH<sub>4</sub> (32.2 mg, 0.513 mmol), triphenylphosphin (13.5 mg, 0.0513 mmol) and (Ph<sub>3</sub>P)<sub>4</sub>Pd (19.8 mg, 0.0171 mmol), and the mixture was stirred at room temperature for 5 h. The reaction mixture was diluted with H<sub>2</sub>O (30 ml), extracted with AcOEt, dried, and concentrated. Purification of the residue by column chromatography (SiO<sub>2</sub> 5 g, hexane/AcOEt = 8/1 to 4/1) gave **18** (88.1 mg, 98%):  $[\alpha]_D^{25} +2.6^\circ$  (*c* 1.04, CHCl<sub>3</sub>); <sup>1</sup>H NMR (300 MHz, CDCl<sub>3</sub>)  $\delta$ 0.87 (t, *J* = 7.2 Hz, 3H), 1.26-1.55 (m, 18H), 1.43 (s, 9H), 1.46 (s, 9H), 2.01 (m, 2H), 2.35-2.41 (m, 2H), 2.38 (t, *J* = 7.5 Hz, 4H), 2.67 (d, *J* = 16.8 Hz, 1H), 2.81 (d, *J* = 16.8 Hz, 1H), 3.67 (dd, *J* = 6.3, 10.8 Hz, 1H), 3.76 (dd, *J* = 5.1, 10.8 Hz, 1H), 4.01 (s, 1H), 5.45 (dd, *J* = 9.6, 15.6 Hz, 1H), 5.58 (dt, *J* = 15.3, 6.3 Hz, 1H); <sup>13</sup>C NMR (75 MHz, CDCl<sub>3</sub>)  $\delta$ 14.0, 22.6, 23.7, 23.9, 28.0, 28.1, 28.9, 29.0, 29.1 (2), 29.2, 31.6, 32.5, 42.7, 42.8, 43.2, 52.5, 62.7, 76.8, 81.4, 82.6, 125.4, 135.9, 170.2, 172.9, 211.6; FTIR (neat) 3492, 1735, 1369, 1251, 1153 cm<sup>-1</sup>; MS (EI) *m/z* 57, 127, 182, 264 (100), 351, 366, 397, 452 [(M-O<sup>t</sup>BuOH)<sup>+</sup>]; HRMS (EI) calcd for C<sub>26</sub>H<sub>45</sub>O<sub>6</sub> [(M-O<sup>t</sup>Bu)<sup>+</sup>] 453.3216, found 453.3204.

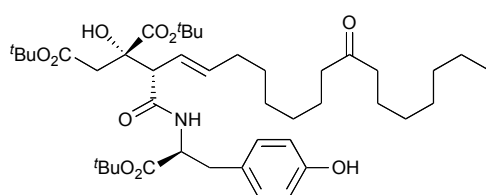

**Viridiofungin A Tri-tert-butyl Ester (4).** To a solution of **18** (62.4 mg, 0.119 mmol) in acetone (5.6 ml) was added Jones reagent (2.68 M solution, 115  $\mu$ l, 0.308 mmol) at  $-78^\circ\text{C}$ , and the mixture was stirred at  $-10^\circ\text{C}$  for 1 h. After

*i*-PrOH (1 ml) was added, the mixture was allowed to warm to room temperature and stirred for 10 min. The reaction mixture was diluted with brine (10 ml), extracted with AcOEt, dried, and concentrated to give the corresponding carboxylic acid (69.4 mg) as a yellow oil which was used for

the next reaction without purification:  $^1\text{H}$  NMR (300 MHz,  $\text{CDCl}_3$ )  $\delta$  0.88 (t,  $J = 6.3$  Hz, 3H), 1.26-1.56 (m, 18H), 1.44 (s, 9H), 1.47 (s, 9H), 2.01 (m, 2H), 2.38 (t,  $J = 7.2$  Hz, 4H), 2.70 (d,  $J = 16.5$  Hz, 1H), 2.90 (d,  $J = 16.5$  Hz, 1H), 3.28 (d,  $J = 9.0$  Hz, 1H), 4.50 (s, 1H), 5.51 (dd,  $J = 9.0, 15.2$  Hz, 1H), 5.69 (dt,  $J = 15.0, 6.6$  Hz, 1H); FTIR (neat) 3748, 3667, 3523, 1737, 1369, 1157  $\text{cm}^{-1}$ .

To a stirred solution of the carboxylic acid (69.4 mg) and L-tyrosin *tert*-butyl ester<sup>3</sup> (101 mg, 0.425 mmol) in DMF (5.6 ml) at 0 °C were added *N*-methylmorpholin (39  $\mu\text{l}$ , 0.354 mmol), 1-hydroxybenzotriazol (57 mg, 0.425 mmol), and 1-(3-dimethylaminopropyl)-3-ethylcarbodiimide hydrochloride (EDCI) (102 mg, 0.531 mmol). After being stirred at room temperature for 5.5 h, the reaction mixture was diluted with 0.05 M HCl (30 ml), extracted with  $\text{Et}_2\text{O}$ , dried, and concentrated. Purification of the residue by column chromatography ( $\text{SiO}_2$  4.5 g, hexane/ AcOEt = 5/1 to 2/1) gave **4** (70.2 mg, 78% by 2 steps) as a yellow oil:  $[\alpha]_{\text{D}}^{25} -8.3^\circ$  ( $c$  1.16, MeOH);  $^1\text{H}$  NMR (400 MHz,  $\text{CDCl}_3$ )  $\delta$  0.87 t,  $J = 6.8$  Hz, 3H), 1.27 br s, 14H), 1.41 (s, 9H), 1.43 s, 9H), 1.44 (s, 9H), 1.56 m, 4H), 1.97 (m, 2H), 2.41 m, 4H), 2.64 (d,  $J = 16.8$  Hz, 1H), 2.75 (d,  $J = 16.8$  Hz, 1H), 2.99 (dd,  $J = 6.6, 14.4$  Hz, 1H), 3.06 (dd,  $J = 5.6, 14.4$  Hz, 1H), 3.09 (d,  $J = 9.6$  Hz, 1H), 4.30 (s, 1H), 4.61 (m, 1H), 5.48 (dd,  $J = 9.4, 15.4$  Hz, 1H), 5.64 (dt,  $J = 15.2, 6.4$  Hz, 1H), 6.21 (br s, 1H), 6.75 (d,  $J = 8.0$  Hz, 2H), 6.84 (d,  $J = 8.0$  Hz, 1H), 7.03 (d,  $J = 8.4$  Hz, 2H);  $^1\text{H}$  NMR (400 MHz,  $\text{CD}_3\text{OD}$ )  $\delta$  0.89 t,  $J = 7.0$  Hz, 3H), 1.29 brs, 14H), 1.43 (s, 18H), 1.44 s, 9H), 1.52 m, 4H), 1.98 (m, 2H), 2.43 t,  $J = 7.3$  Hz, 4H), 2.49 (d,  $J = 16.4$  Hz, 1H), 2.76 (d,  $J = 16.4$  Hz, 1H), 2.85 (dd,  $J = 8.8, 14.0$  Hz, 1H), 3.01 (dd,  $J = 5.6, 14.0$  Hz, 1H), 3.12 (d,  $J = 8.8$  Hz, 1H), 4.47 (dd,  $J = 5.4, 8.6$  Hz, 1H), 5.49 (dd,  $J = 8.8, 15.6$  Hz, 1H), 5.57 (dt,  $J = 15.6, 6.4$  Hz, 1H), 6.67 (d,  $J = 8.4$  Hz, 2H), 7.01 (d,  $J = 8.4$  Hz, 2H);  $^{13}\text{C}$  NMR (75 MHz,  $\text{CDCl}_3$ )  $\delta$  14.0, 22.6, 23.6, 23.9, 27.9, 28.0, 28.6, 29.0, 29.1, 29.2, 31.6, 32.5, 37.1, 42.5, 42.7, 42.9, 54.0, 58.1, 75.6, 81.4, 82.1, 83.0, 115.3, 122.5, 127.5, 130.6, 137.0, 155.4, 169.5, 170.4, 170.5, 171.9, 212.8; FTIR (neat) 3365, 1731, 1652, 1521, 1365, 1253, 1159  $\text{cm}^{-1}$ ; MS (EI)  $m/z$  57 (100), 136, 171, 379, 428, 546, 686  $[(\text{M}-\text{O}^t\text{Bu})^+]$ , 759 ( $\text{M}^+$ ); HRMS (EI) calcd for  $\text{C}_{43}\text{H}_{69}\text{NO}_{10}$  ( $\text{M}^+$ ) 759.4922, found 759.4925.

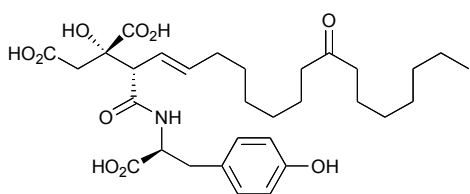

**Viridiofungin A (1).** A mixture of **4** (32.2 mg, 0.0424 mmol) in  $\text{HCO}_2\text{H}$  (1.5 ml) was stirred at room temperature for 40 min. Most of the  $\text{HCO}_2\text{H}$  was removed by azeotropic distillation with toluene, the residue was purified by column

chromatography (ODS 1 g, MeOH/ $\text{H}_2\text{O}$  = 1/1) to afford **1** (18.5 mg, 74%) as a white powder:  $[\alpha]_{\text{D}}^{26} -15.2^\circ$  ( $c$  0.93, MeOH) {lit.<sup>4</sup>  $[\alpha]_{\text{D}}^{25} -18.2^\circ$  ( $c$  2.37, MeOH)};  $^1\text{H}$  NMR (500 MHz,  $\text{CD}_3\text{OD}$ )  $\delta$  0.88 t,  $J = 7.0$  Hz, 3H), 1.28 br s, 14H), 1.53 (m, 4H), 1.97 (m, 2H), 2.42 t,  $J = 7.3$  Hz, 3H), 2.43 t,  $J = 7.3$  Hz, 3H), 2.62 (d,  $J = 16.3$  Hz, 1H), 2.86-2.92 (m, 3H), 3.10 (dd,  $J = 4.6, 14.1$  Hz, 1H), 3.21 (d,  $J = 8.0$  Hz, 1H), 4.60 (dd,  $J = 4.8, 8.5$  Hz, 1H), 5.53 (m, 2H), 6.67 (d,  $J = 8.5$  Hz, 2H), 7.02 (d,  $J = 8.5$  Hz,

# Supplementary Material (ESI) for Chemical Communications

# This journal is © The Royal Society of Chemistry 2005

2H);  $^{13}\text{C}$  NMR (125 MHz,  $\text{CD}_3\text{OD}$ )  $\delta$ 14.4, 23.7, 24.8, 24.9, 29.8, 29.9, 30.0, 30.2, 30.3, 32.9, 33.5, 37.5, 43.1, 43.5(2), 55.1, 57.7, 80.0, 116.2 (2), 124.5, 128.7, 131.4 (2), 137.6, 157.4, 173.6, 173.9, 174.5, 175.8, 214.6; FTIR (neat) 3748, 3656, 3363, 1712, 1523, 1454, 1232  $\text{cm}^{-1}$ ; MS (EI)  $m/z$  164 (100), 465, 511  $[(\text{M}-2\text{H}_2\text{O}-\text{CO}_2)^+]$ ; HRMS (EI) calcd for  $\text{C}_{30}\text{H}_{41}\text{NO}_6$   $[(\text{M}-2\text{H}_2\text{O}-\text{CO}_2)^+]$  511.2934, found 511.2922; HRMS (FAB, NBA) calcd for  $\text{C}_{31}\text{H}_{46}\text{NO}_{10}$   $[(\text{M}+\text{H})^+]$  592.3121, found 592.3110. These data were identical with those reported.<sup>4</sup>

## References

1. T. Esumi, Y. Iwabuchi, H. Irie and S. Hatakeyama, *Tetrahedron Lett.*, 1998, **39**, 877.
2. C. Santini, R. G. Ball and G. D. Berger, *J. Org. Chem.*, 1994, **59**, 2261.
3. S. Ohta, A. Shimabayashi, N. Makino and M. Okamoto, *Yakugaku Zasshi*, 1983, **103**, 991.
4. G. H. Harris, E. T. T. Jones, M. S. Meinz, M. Nallin-Omstead, G. L. Helms, G. F. Bills, D. Zink and K. E. Wilson, *Tetrahedron Lett.*, 1993, **34**, 5235.
